# Supplementary material for: Block, random and palm-tree amphiphilic fluorinated copolymers: controlled synthesis, surface activity and use as dispersion polymerization stabilizers
Source: Royal Society of Chemistry journal article supplement (doi:10.1039/c4py00366g), 2014-01-01
Supplement: c4py00366g1.pdf [file c4py00366g1.pdf]

Supporting information: Block, random and palm-tree amphiphilic fluorinated copolymers: controlled synthesis, surface activity and use as dispersion polymerization stabilizers

Alaimo David<sup>1</sup>, Beigbeder Alexandre<sup>2</sup>, Dubois Philippe<sup>2</sup>, Broze Guy<sup>1</sup>, Jérôme Christine<sup>1\*</sup> and Grignard Bruno<sup>1</sup>

(1) Center for Education and Research on Macromolecules (CERM), University of Liège, B6a, Sart-Tilman, B-4000 Liège, Belgium.

(2) Laboratory of Polymeric and Composite Materials, Université de Mons-Hainaut, 20 Place du Parc, B-7000 Mons, Belgium.

\*corresponding author

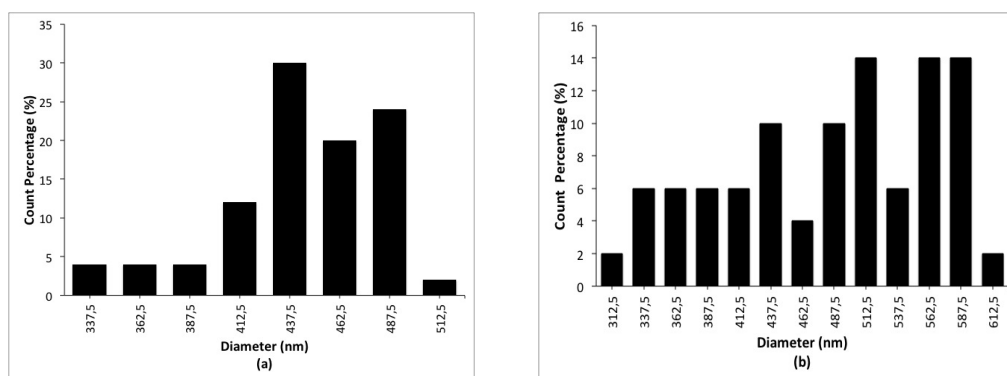

Figure S1: Particles size distribution histogram determined from SEM observation for poly(HEMA) obtained after (a) 2h and (b) 24h of polymerization in presence of the block stabilizer.
